# Supplementary material for: LC–DAD–MS Phenolic Characterisation of Six Invasive Plant Species in Croatia and Determination of Their Antimicrobial and Cytotoxic Activity
Source: MDPI journal article supplement (doi:10.3390/plants11050596), 2022-02-23
Supplement: s1 [file s1]

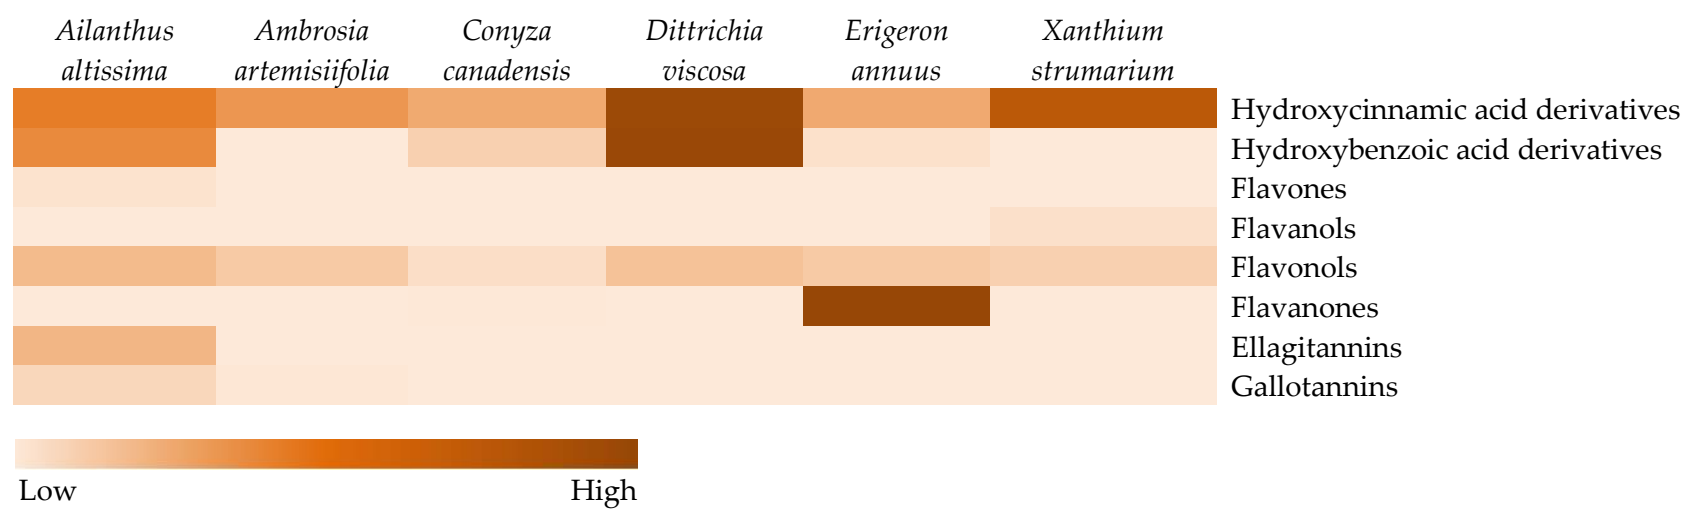

**Figure S1.** Heat map presenting the representation of phenolic groups in different invasive plants.
