# Supplementary material for: LC–DAD–MS Phenolic Characterisation of Six Invasive Plant Species in Croatia and Determination of Their Antimicrobial and Cytotoxic Activity
Source: MDPI journal article supplement (doi:10.3390/plants11050596), 2022-02-23
Supplement: s1 [file s1]

**Table S1.** Spectrum, mass to charge ratio ( $m/z$ ) values of the molecular masses and main fragments (MS<sup>2</sup> – second-generation product ion; MS<sup>3</sup> – third-generation product ion) in negative ion mode ([M-H]<sup>-</sup>) identified with ESI-MS and the distribution of individual compounds in different invasive plants.

| Phenolics                                   | $\lambda_{\max}$ | MS $m/z$ | MS <sup>2</sup>         | MS <sup>3</sup> | <i>Ailanthus altissima</i> | <i>Ambrosia artemisiifolia</i> | <i>Conyza canadensis</i> | <i>Dittrichia viscosa</i> | <i>Erigeron annuus</i> | <i>Xanthium strumarium</i> |
|---------------------------------------------|------------------|----------|-------------------------|-----------------|----------------------------|--------------------------------|--------------------------|---------------------------|------------------------|----------------------------|
| <b>Hydroxycinnamic acid derivatives</b>     |                  |          |                         |                 |                            |                                |                          |                           |                        |                            |
| Neochlorogenic acid (3-Caffeoylquinic acid) | 234, 326         | 353      | 191, 179, 135           | 173, 127, 85    | X                          | X                              | X                        | X                         | X                      | X                          |
| Cryptogenic acid (4-Caffeoylquinic acid)    | 234, 328         | 353      | 173, 179                |                 | X                          | X                              | X                        |                           | X                      | X                          |
| Chlorogenic acid (5-Caffeoylquinic acid)    | 234, 328         | 353      | 191, 179                | 127, 93, 85     | X                          | X                              | X                        | X                         | X                      | X                          |
| Caftaric acid 1                             | 308, 328         | 311      | 179, 149, 135           |                 |                            | X                              |                          |                           |                        |                            |
| Caftaric acid 2                             | 308, 328         | 311      | 179, 149, 135           |                 |                            | X                              |                          |                           |                        |                            |
| Caffeic acid                                | 321              | 179      | 135                     |                 |                            | X                              |                          |                           |                        |                            |
| Caffeic acid derivative 1                   | 272, 325         | 335      | 179, 161                | 135             |                            | X                              |                          |                           | X                      |                            |
| Caffeic acid derivative 2                   | 272, 325         | 335      | 179, 161                | 135             |                            | X                              |                          |                           |                        |                            |
| Dicaffeoylquinic acid 1                     | 246, 316         | 515      | 353                     | 191, 179        |                            | X                              | X                        | X                         | X                      | X                          |
| Dicaffeoylquinic acid 2                     | 246, 316         | 515      | 353                     | 191, 179        |                            | X                              | X                        | X                         | X                      | X                          |
| Dicaffeoylquinic acid 3                     | 246, 316         | 515      | 353                     | 191, 179        |                            | X                              | X                        | X                         | X                      | X                          |
| Dicaffeoylquinic acid 4                     | 246, 316         | 515      | 353                     | 191, 179        |                            |                                |                          | X                         |                        |                            |
| Dicaffeoylquinic acid 5                     | 246, 316         | 515      | 353                     | 191, 179        |                            |                                |                          | X                         |                        |                            |
| Tricaffeoylquinic acid 1                    | 296, 326         | 677      | 497, 515, 353           | 191, 179        |                            |                                |                          |                           | X                      | X                          |
| Tricaffeoylquinic acid 2                    | 296, 326         | 677      | 497, 515, 353           | 191, 179        |                            |                                |                          |                           | X                      | X                          |
| 3- <i>p</i> -Coumaroylquinic acid           | 312              | 337      | 163                     |                 | X                          | X                              | X                        | X                         | X                      |                            |
| 4- <i>p</i> -Coumaroylquinic acid           | 312              | 337      | 173, 163, 155, 137, 191 |                 | X                          |                                |                          |                           |                        |                            |
| 5- <i>p</i> -Coumaroylquinic acid           | 312              | 337      | 191, 173, 163, 155      |                 | X                          | X                              | X                        | X                         | X                      | X                          |
| 3-Feruloylquinic acid                       | 320              | 367      | 193, 134                | 149             | X                          | X                              | X                        |                           |                        | X                          |
| 5-Feruloylquinic acid                       | 322              | 367      | 191                     | 173, 127, 85    |                            | X                              |                          |                           |                        | X                          |
| <b>Hydroxybenzoic acid derivatives</b>      |                  |          |                         |                 |                            |                                |                          |                           |                        |                            |
| Ellagic acid                                | 254, 365         | 301      | 271, 257, 229, 185      |                 |                            |                                | X                        |                           |                        |                            |
| Ellagic acid pentoside                      | 251, 360         | 433      | 301                     | 299, 257, 185   | X                          |                                |                          |                           |                        |                            |
| Ellagic acid hexoside 1                     | 252, 368         | 463      | 301                     | 299, 257, 185   |                            |                                |                          | X                         | X                      |                            |
| Ellagic acid hexoside 2                     | 252, 368         | 463      | 301                     | 299, 257, 185   |                            |                                |                          | X                         |                        |                            |
| Ellagic acid rhamnoside                     | 372, 250         | 447      | 301                     | 299, 257, 185   |                            |                                |                          |                           | X                      |                            |

|                                |          |     |                    |               |   |   |   |   |   |   |
|--------------------------------|----------|-----|--------------------|---------------|---|---|---|---|---|---|
| <b>Flavones</b>                |          |     |                    |               |   |   |   |   |   |   |
| Apigenin                       | 268,329  | 269 | 225, 183, 151      |               |   |   |   |   |   | X |
| Apigenin hexoside              | 268,329  | 431 | 269                | 225, 183, 151 | X |   |   |   |   |   |
| <b>Flavanols</b>               |          |     |                    |               |   |   |   |   |   |   |
| Procyanidin dimer              | 278      | 577 | 451,425,407,289    |               |   |   |   |   |   | X |
| Epicatechin                    | 234,279  | 289 | 245, 205, 179, 261 | 203, 227, 161 |   |   |   |   |   | X |
| <b>Flavonols</b>               |          |     |                    |               |   |   |   |   |   |   |
| Quercetin-dihexoside           | 254, 362 | 625 | 463                | 301, 273, 179 |   | X | X |   | X |   |
| Quercetin galloyl hexoside 1   | 266, 356 | 615 | 463                | 301, 245, 179 | X |   |   |   |   |   |
| Quercetin galloyl hexoside 2   | 266, 356 | 615 | 463                | 301, 245, 179 | X |   |   |   |   |   |
| Quercetin-3-galactoside        | 256,356  | 463 | 301                | 179, 151      | X | X |   | X |   |   |
| Quercetin-3-glucoside          | 255,355  | 463 | 301                | 179, 151      | X | X | X | X | X | X |
| Quercetin-3-rutinoside         | 255,355  | 609 | 301                | 179, 151      |   | X |   | X |   | X |
| Quercetin-3-xyloside           | 256,356  | 433 | 301                | 151           |   | X | X | X |   | X |
| Quercetin-3-rhamnoside         | 266,356  | 447 | 301                | 179           |   |   |   |   | X |   |
| Quercetin glucuronide          | 256, 354 | 477 | 301                | 179, 151      |   | X | X | X | X | X |
| Quercetin-3-arabinopyranoside  | 256, 352 | 433 | 301                | 271, 179      |   | X | X | X |   |   |
| Quercetin acetyl hexoside      | 256, 352 | 549 | 505                | 301           | X |   |   |   |   |   |
| Kaempferol hexoside            | 266,348  | 447 | 285                | 257, 229      | X | X | X | X | X | X |
| Kaempferol acetyl hexoside 1   | 267, 349 | 489 | 429                | 285           | X | X |   |   |   |   |
| Kaempferol acetyl hexoside 2   | 267, 349 | 489 | 429                | 285           | X |   |   |   |   |   |
| Kaempferol-3-rutinoside        | 266, 346 | 593 | 285                |               |   |   |   |   | X |   |
| Kaempferol-3-glucuronide 1     | 348, 266 | 461 | 285                |               |   | X | X | X | X | X |
| Kaempferol-rhamnoside-hexoside | 266, 346 | 593 | 285                |               | X |   |   |   | X |   |
| Kaempferol-galloyl-hexoside    | 348, 266 | 599 | 447                | 313, 285, 169 | X |   |   |   | X |   |
| Kaempferol glucuronyl hexoside | 348, 266 | 623 | 447                | 285           |   |   |   |   | X |   |
| Isorhamnetin hexoside          | 255,352  | 477 | 357, 315           | 300, 271, 257 |   | X |   | X |   |   |
| Isorhamnetin-acetyl-hexoside   | 336      | 519 | 459, 315           | 300, 273      |   | X |   |   |   |   |
| Isorhamnetin-3-rutinoside      | 255, 325 | 623 | 315                | 300, 273      |   | X |   |   |   |   |
| Myricetin-3-glucuronide        | 261, 349 | 493 | 317, 271           | 171, 151      |   |   |   |   | X |   |
| Myricetin hexoside             | 261, 349 | 479 | 317                |               |   |   |   | X |   |   |
| Laricitrin-3-glucuronide       | 253, 354 | 507 | 331                |               |   | X |   | X |   |   |

|                                |          |     |                    |          |   |   |
|--------------------------------|----------|-----|--------------------|----------|---|---|
| Laricitrin                     | 265, 372 | 347 | 331                |          |   | X |
| Syringetin                     | 251, 370 | 359 | 345, 315           | 312, 283 |   | X |
| <b>Flavanones</b>              |          |     |                    |          |   |   |
| Naringenin hexoside 1          | 283,340  | 433 | 271                | 151      | X | X |
| Naringenin hexoside 2          | 283,340  | 433 | 271                | 151      |   | X |
| <b>Ellagitannins</b>           |          |     |                    |          |   |   |
| Vescalagin isomer              | 203      | 953 | 933, 915, 871, 569 | 301      | X |   |
| <b>Gallotannins</b>            |          |     |                    |          |   |   |
| Gallic acid                    | 271      | 169 | 125                | 125      | X |   |
| Digalloyl-HHDP-hexoside isomer | 262      | 785 | 783, 633, 615      | 483, 301 | X |   |
