# Supplementary material for: LC–DAD–MS Phenolic Characterisation of Six Invasive Plant Species in Croatia and Determination of Their Antimicrobial and Cytotoxic Activity
Source: MDPI journal article supplement (doi:10.3390/plants11050596), 2022-02-23
Supplement: s1 [file s1]

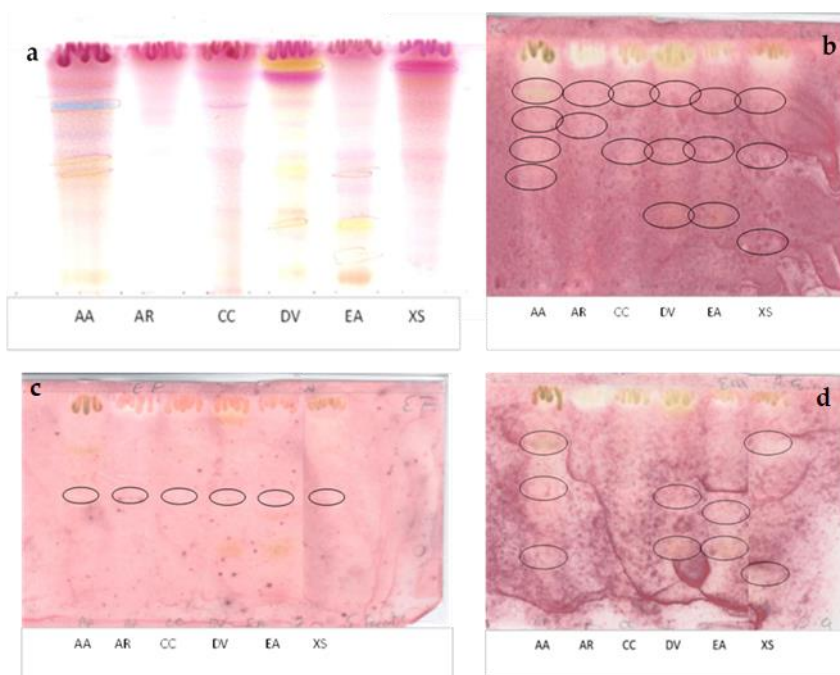

**Figure S2.** a) Chromatogram of the acetone extracts of the plant species leaves developed in ethyl acetate:methanol:water (EMW) solvent system sprayed with vanillin-sulphuric acid. TLC bioautograms of b) *Staphylococcus aureus*, c) *Enterococcus faecalis*, and d) *Pseudomonas aeruginosa* developed with EMW solvent system. White bands (circled) indicate compounds that inhibit the growth of the bacteria. AA = *A. altissima*; AR = *A. artemisiifolia*; CC = *C. canadensis*; DV = *D. viscosa*; EA = *E. annuus*; XS = *X. strumarium*.
